# Supplementary material for: Activation of RidA chaperone function by N-chlorination
Source: PubMed Central journal article supplement (PMC4284807; doi:10.1038/ncomms6804), 2014-12-17
Supplement: ncomms6804-s1.pdf [file ncomms6804-s1.pdf]

## SUPPLEMENTARY TABLES

**Supplementary Table 1: Primers and *Escherichia coli* strains used in this study**

| Primer     | Sequence (5' - 3')                                                                                                                                                  | Source                      |
|------------|---------------------------------------------------------------------------------------------------------------------------------------------------------------------|-----------------------------|
| hslo-fw    | CGACCTGTTACGATTAAACACGGC                                                                                                                                            | This study                  |
| hslo-rv    | CGTAAAATCCGGCAGAGCCC                                                                                                                                                | This study                  |
| K1         | CAGTCATAGCCGAATAGCCT                                                                                                                                                | <sup>1</sup>                |
| K2         | GGTGCCCTGAATGAACTGC                                                                                                                                                 | <sup>1</sup>                |
| Strain     | Genotype                                                                                                                                                            | Source                      |
| BL21 (DE3) | F <sup>-</sup> <i>ompT gal dcm lon hsdS<sub>B</sub>(r<sub>B</sub><sup>-</sup> m<sub>B</sub><sup>-</sup>)</i> λ(DE3 [ <i>lacI lacUV5-T7 gene 1 ind1 sam7 nin5</i> ]) | Stratagene, Santa Clara, CA |
| CL048      | BL21 (DE3) <i>ridA::Kan</i>                                                                                                                                         | <sup>2</sup>                |
| CL053      | BL21 (DE3) pCL001 (RidA in pET11-a)                                                                                                                                 | <sup>2</sup>                |
| CL054      | CL048 pCL002 (RidA Cys107Ser in pET11-a)                                                                                                                            | <sup>2</sup>                |
| AM01       | BL21 (DE3) <i>ridA::Kan</i> (RidA in pET22-b)                                                                                                                       | This study                  |
| NL59       | BL21 (DE3) ( <i>IlvA</i> in pET22-b)                                                                                                                                | This study                  |
| NL60       | CL048 (DUK114 in pET11-a)                                                                                                                                           | This study                  |
| AM02       | BL21 (DE3) <i>hslO::Kan</i>                                                                                                                                         | This study                  |

**Supplementary Table 2: RidA substrate proteins identified from HOCl-treated and untreated cell lysates**

| GenBank ID | Protein function                                            | Ratio +DTT/Control <sup>a</sup> | Mean protein quantity (fmol) <sup>b</sup> |         | Standard deviation <sup>b</sup> |         | Abundance ranking <sup>c</sup> |
|------------|-------------------------------------------------------------|---------------------------------|-------------------------------------------|---------|---------------------------------|---------|--------------------------------|
|            |                                                             |                                 | Control                                   | +DTT    | Control                         | +DTT    |                                |
| 1790433    | HupA HU DNA binding transcriptional regulator alpha subunit | 574.79                          | 2.13                                      | 1225.00 | 0.56                            | 1065.00 | 45                             |
| 1789698    | RpmD 50S ribosomal subunit protein L30                      | 511.49                          | 4.58                                      | 2343.09 | 2.06                            | 1736.08 | 87                             |
| 1786206    | RpsT 30S ribosomal subunit protein S20                      | 196.80                          | 4.40                                      | 866.13  | 3.72                            | 539.22  | 75                             |
| 1789702    | RpsH 30S ribosomal subunit protein S8                       | 132.44                          | 7.04                                      | 932.53  | 2.35                            | 647.42  | 109                            |
| 1786822    | AhpC alkyl hydroperoxide reductase C22 subunit              | 126.29                          | 0.65                                      | 82.21   | 0.01                            | 59.84   | 13                             |
| 1786644    | HupB HU DNA binding transcriptional regulator beta subunit  | 123.35                          | 0.78                                      | 95.96   | 0.51                            | 79.37   | 112                            |
| 1790067    | RpmG 50S ribosomal subunit protein L33                      | 117.06                          | 2.77                                      | 324.63  | 2.93                            | 173.89  | 53                             |
| 2367334    | RplK 50S ribosomal subunit protein L11                      | 109.83                          | 33.50                                     | 3679.50 | 13.47                           | 2231.20 | 61                             |
| 1790647    | RplI 50S ribosomal subunit protein L9                       | 107.36                          | 9.78                                      | 1050.22 | 5.24                            | 853.03  | 30                             |
| 1788126    | CspC stress protein member of the CspA family               | 89.02                           | 11.05                                     | 983.72  | 5.71                            | 812.89  | 7                              |
| 1790417    | RplJ 50S ribosomal subunit protein L10                      | 88.84                           | 17.15                                     | 1523.30 | 6.10                            | 1157.60 | 111                            |
| 1790416    | RplA 50S ribosomal subunit protein L1                       | 88.11                           | 22.91                                     | 2018.28 | 10.81                           | 1216.66 | 49                             |
| 1786841    | CspE DNA binding transcriptional repressor                  | 79.66                           | 8.21                                      | 654.07  | 3.75                            | 530.85  | 56                             |
| 1790585    | GroS Cpn10 chaperonin GroES small subunit of GroESL         | 78.13                           | 3.14                                      | 245.46  | 1.06                            | 212.54  | 4                              |
| 1789699    | RpsE 30S ribosomal subunit protein S5                       | 74.72                           | 18.04                                     | 1348.24 | 4.87                            | 347.70  | 11                             |
| 1788012    | InfC protein chain initiation factor IF 3                   | 68.00                           | 7.08                                      | 481.30  | 0.76                            | 254.73  | 118                            |
| 1786351    | ErpA iron sulfur cluster insertion protein                  | 65.86                           | 2.49                                      | 164.06  | 0.83                            | 21.24   | 244                            |
| 1786351    | RplW 50S ribosomal subunit protein L23                      | 65.62                           | 6.10                                      | 400.39  | 0.79                            | 235.65  | 8                              |
| 1787335    | FabG 3 oxoacyl acyl carrier protein reductase               | 61.91                           | 1.35                                      | 83.76   | 0.53                            | 62.88   | 201                            |
| 1788855    | GuaB IMP dehydrogenase                                      | 60.99                           | 0.61                                      | 37.44   | 0.27                            | 29.68   | 123                            |
| 1789700    | RplR 50S ribosomal subunit protein L18                      | 58.85                           | 10.03                                     | 590.55  | 2.56                            | 407.91  | 100                            |
| 1788958    | RplS 50S ribosomal subunit protein L19                      | 58.67                           | 22.46                                     | 1318.09 | 8.92                            | 668.89  | 33                             |
| 1789577    | RplU 50S ribosomal subunit protein L21                      | 56.67                           | 16.14                                     | 914.73  | 8.43                            | 947.93  | 79                             |
| 1789705    | RplX 50S ribosomal subunit protein L24                      | 56.16                           | 9.07                                      | 509.41  | 6.58                            | 424.83  | 25                             |
| 1789697    | RplO 50S ribosomal subunit protein L15                      | 51.45                           | 10.72                                     | 551.50  | 3.24                            | 378.48  | 101                            |
| 1788160    | PykA pyruvate kinase II                                     | 51.34                           | 2.04                                      | 104.99  | 0.54                            | 80.32   | 370                            |
| 1789446    | RpsU 30S ribosomal subunit protein S21                      | 48.51                           | 5.57                                      | 269.99  | 1.20                            | 159.61  | 79                             |
| 1789716    | RplC 50S ribosomal subunit protein L3                       | 48.20                           | 37.33                                     | 1799.33 | 16.96                           | 1387.12 | 39                             |
| 1789559    | InfB fused protein chain initiation factor 2 IF2            | 48.05                           | 1.31                                      | 62.81   | 0.17                            | 5.80    | 217                            |

| GenBank ID | Protein function                                                                   | Ratio +DTT/Control <sup>a</sup> | Mean protein quantity (fmol) <sup>b</sup> |         | Standard deviation <sup>b</sup> |         | Abundance ranking <sup>c</sup> |
|------------|------------------------------------------------------------------------------------|---------------------------------|-------------------------------------------|---------|---------------------------------|---------|--------------------------------|
|            |                                                                                    |                                 | Control                                   | +DTT    | Control                         | +DTT    |                                |
| 1789711    | RplV 50S ribosomal subunit protein L22                                             | 46.20                           | 4.19                                      | 193.73  | 2.75                            | 54.62   | 18                             |
| 1787336    | AcpP acyl carrier protein ACP                                                      | 45.69                           | 5.23                                      | 239.14  | 2.19                            | 36.33   | 3                              |
| 1786196    | DksA DNA binding transcriptional regulator of rRNA transcription DnaK suppressor   | 44.16                           | 5.97                                      | 263.61  | 3.67                            | 203.31  | 117                            |
| 1789701    | RplF 50S ribosomal subunit protein L6                                              | 43.55                           | 35.90                                     | 1563.79 | 8.77                            | 1011.56 | 21                             |
| 1788755    | PtsH phosphohistidinoprotein hexose phosphotransferase component of PTS system Hpr | 42.17                           | 3.23                                      | 136.18  | 0.57                            | 110.71  | NA <sup>d</sup>                |
| 1788079    | GapA glyceraldehyde 3 phosphate dehydrogenase A                                    | 42.10                           | 3.49                                      | 146.92  | 1.07                            | 111.09  | 5                              |
| 1788512    | RplY 50S ribosomal subunit protein L25                                             | 41.33                           | 3.03                                      | 125.02  | 1.06                            | 101.74  | 22                             |
| 1789141    | Eno enolase                                                                        | 39.89                           | 3.94                                      | 157.20  | 1.38                            | 122.21  | 66                             |
| 1789712    | RpsS 30S ribosomal subunit protein S19                                             | 38.67                           | 3.42                                      | 132.36  | 2.10                            | 41.97   | 62                             |
| 1788967    | GrpE heat shock protein                                                            | 38.11                           | 1.27                                      | 48.59   | 0.16                            | 59.07   | 160                            |
| 1786640    | Tig peptidyl prolyl cis trans isomerase trigger factor                             | 37.71                           | 6.35                                      | 239.28  | 2.30                            | 181.48  | 73                             |
| 1788757    | Crr glucose specific enzyme IIA component of PTS                                   | 36.15                           | 1.58                                      | 57.12   | 0.18                            | 5.50    | 77                             |
| 1786366    | Tsf protein chain elongation factor EF Ts                                          | 36.13                           | 4.64                                      | 167.61  | 1.75                            | 99.72   | 44                             |
| 1789703    | RpsN 30S ribosomal subunit protein S14                                             | 35.80                           | 1.92                                      | 68.65   | 0.98                            | 20.39   | 159                            |
| 1788005    | IhfA integration host factor IHF DNA binding protein alpha subunit                 | 35.06                           | 1.52                                      | 53.22   | 0.57                            | 25.66   | 190                            |
| 1788473    | MglB methyl galactoside transporter subunit                                        | 32.45                           | 1.40                                      | 45.39   | 0.60                            | 33.28   | 323                            |
| 1789704    | RplE 50S ribosomal subunit protein L5                                              | 32.24                           | 11.43                                     | 368.47  | 4.28                            | 261.34  | 36                             |
| 1790068    | RpmB 50S ribosomal subunit protein L28                                             | 32.15                           | 5.54                                      | 178.23  | 1.58                            | 30.98   | 80                             |
| 1789717    | RpsJ 30S ribosomal subunit protein S10                                             | 32.03                           | 68.00                                     | 2178.20 | 12.10                           | 1301.88 | 35                             |
| 1789692    | RpsK 30S ribosomal subunit protein S11                                             | 31.10                           | 5.98                                      | 185.84  | 3.19                            | 57.73   | 16                             |
| 1790590    | Efp polyproline specific translation elongation factor EF P                        | 29.99                           | 2.04                                      | 61.32   | 0.77                            | 47.20   | 204                            |
| 1790586    | GroL Cpn60 chaperonin GroEL large subunit of GroESL                                | 28.53                           | 8.67                                      | 247.26  | 1.25                            | 171.84  | 64                             |
| 1787965    | PykF pyruvate kinase I                                                             | 28.06                           | 4.01                                      | 112.48  | 1.77                            | 87.25   | 161                            |
| 1786362    | DapD 2 3 4 5 tetrahydropyridine 2 carboxylate N succinyltransferase                | 27.80                           | 0.84                                      | 23.27   | 0.61                            | 4.05    | 65                             |
| 1790835    | PrfC peptide chain release factor RF 3                                             | 27.77                           | 2.62                                      | 72.87   | 1.67                            | 7.05    | NA <sup>d</sup>                |
| 1786948    | SucC succinyl CoA synthetase beta subunit                                          | 27.22                           | 2.27                                      | 61.67   | 0.81                            | 45.20   | 86                             |
| 1786368    | Frr ribosome recycling factor                                                      | 26.06                           | 3.45                                      | 90.02   | 2.38                            | 16.86   | 144                            |
| 1789576    | RpmA 50S ribosomal subunit protein L27                                             | 25.65                           | 5.69                                      | 145.97  | 1.63                            | 89.21   | NA <sup>d</sup>                |
| 87082118   | Upp uracil phosphoribosyltransferase                                               | 25.55                           | 3.31                                      | 84.48   | 0.46                            | 51.85   | NA <sup>d</sup>                |

| GenBank ID | Protein function                                                                   | Ratio +DTT/Control <sup>a</sup> | Mean protein quantity (fmol) <sup>b</sup> |         | Standard deviation <sup>b</sup> |        | Abundance ranking <sup>c</sup> |
|------------|------------------------------------------------------------------------------------|---------------------------------|-------------------------------------------|---------|---------------------------------|--------|--------------------------------|
|            |                                                                                    |                                 | Control                                   | +DTT    | Control                         | +DTT   |                                |
| 1787423    | MinD membrane ATPase of the MinC MinD MinE system                                  | 25.23                           | 0.57                                      | 14.38   | 0.02                            | 14.88  | 371                            |
| 1789740    | RpsL 30S ribosomal subunit protein S12                                             | 24.76                           | 2.05                                      | 50.69   | 0.65                            | 19.13  | NA <sup>d</sup>                |
| 1787489    | Hns global DNA binding transcriptional dual regulator H NS                         | 24.44                           | 1.28                                      | 31.35   | 0.47                            | 16.41  | 37                             |
| 1789294    | Pgk phosphoglycerate kinase protein                                                | 24.43                           | 2.32                                      | 56.78   | 0.28                            | 43.06  | 47                             |
| 1789707    | RpsQ 30S ribosomal subunit protein S17                                             | 22.85                           | 3.92                                      | 89.64   | 0.56                            | 52.91  | NA <sup>d</sup>                |
| 1788663    | FabB 3 oxoacyl acyl carrier protein synthase I                                     | 22.30                           | 3.70                                      | 82.44   | 1.06                            | 62.26  | 42                             |
| 1788949    | RaiA cold shock protein associated with 30S ribosomal subunit                      | 22.26                           | 3.86                                      | 85.97   | 1.10                            | 63.44  | NA <sup>d</sup>                |
| 2367114    | CspG cold shock protein homolog cold inducible                                     | 22.21                           | 0.92                                      | 20.50   | 1.06                            | 30.49  | NA <sup>d</sup>                |
| 1788635    | Pta phosphate acetyltransferase                                                    | 21.76                           | 2.09                                      | 45.54   | 0.67                            | 33.34  | 340                            |
| 1789739    | RpsG 30S ribosomal subunit protein S7                                              | 21.29                           | 4.23                                      | 90.02   | 1.71                            | 59.26  | 26                             |
| 1789715    | RplD 50S ribosomal subunit protein L4                                              | 21.25                           | 21.44                                     | 455.61  | 5.10                            | 246.01 | 48                             |
| 1790844    | DeoD purine nucleoside phosphorylase                                               | 21.14                           | 3.71                                      | 78.48   | 1.45                            | 60.09  | NA <sup>d</sup>                |
| 1786365    | RpsB 30S ribosomal subunit protein S2                                              | 20.86                           | 68.90                                     | 1437.21 | 29.14                           | 906.72 | 55                             |
| 1788878    | IscU iron sulfur cluster assembly scaffold protein                                 | 20.47                           | 2.23                                      | 45.65   | 0.82                            | 14.91  | NA <sup>d</sup>                |
| 87081689   | Hpt hypoxanthine phosphoribosyltransferase                                         | 20.00                           | 2.38                                      | 47.61   | 0.37                            | 8.55   | NA <sup>d</sup>                |
| 296040586  | RpsF 30S ribosomal subunit protein S6                                              | 19.52                           | 10.00                                     | 195.13  | 8.12                            | 152.05 | 50                             |
| 1787488    | GalU glucose 1 phosphate uridylyltransferase                                       | 19.43                           | 0.97                                      | 18.87   | 0.19                            | 1.73   | 261                            |
| 1789819    | NfuA Fe S biogenesis protein possible scaffold chaperone for damaged Fe S proteins | 19.40                           | 1.46                                      | 28.28   | 0.18                            | 3.69   | 127                            |
| 226510965  | RpsI 30S ribosomal subunit protein S9                                              | 18.06                           | 3.94                                      | 71.10   | 2.28                            | 4.59   | 85                             |
| 1789738    | FusA protein chain elongation factor EF G GTP binding                              | 17.78                           | 5.73                                      | 101.82  | 2.82                            | 75.74  | 14                             |
| 1789691    | RpsD 30S ribosomal subunit protein S4                                              | 17.08                           | 9.40                                      | 160.53  | 3.65                            | 86.68  | 31                             |
| 1790217    | Rho transcription termination factor                                               | 16.76                           | 4.64                                      | 77.86   | 0.52                            | 46.95  | 134                            |
| 1789706    | RplN 50S ribosomal subunit protein L14                                             | 16.54                           | 9.98                                      | 164.98  | 1.69                            | 54.04  | 116                            |
| 1789693    | RpsM 30S ribosomal subunit protein S13                                             | 15.71                           | 4.80                                      | 75.37   | 0.97                            | 49.81  | 12                             |
| 1788756    | PtsI PEP protein phosphotransferase of PTS system enzyme I                         | 15.38                           | 1.81                                      | 27.91   | 0.53                            | 15.19  | 143                            |
| 1790418    | RplL 50S ribosomal subunit protein L7 L12                                          | 14.92                           | 29.27                                     | 436.56  | 3.31                            | 250.31 | 1                              |
| 1789265    | YgfZ iron sulfur cluster repair protein plumbagin resistance                       | 14.03                           | 3.13                                      | 43.95   | 0.71                            | 31.43  | 213                            |
| 1789710    | RpsC 30S ribosomal subunit protein S3                                              | 12.83                           | 11.40                                     | 146.19  | 1.54                            | 21.69  | 38                             |

| GenBank ID | Protein function                                                                       | Ratio +DTT/Control <sup>a</sup> | Mean protein quantity (fmol) <sup>b</sup> |         | Standard deviation <sup>b</sup> |         | Abundance ranking <sup>c</sup> |
|------------|----------------------------------------------------------------------------------------|---------------------------------|-------------------------------------------|---------|---------------------------------|---------|--------------------------------|
|            |                                                                                        |                                 | Control                                   | +DTT    | Control                         | +DTT    |                                |
| 1789709    | RplP 50S ribosomal subunit protein L16                                                 | 12.79                           | 6.72                                      | 85.97   | 3.38                            | 58.53   | 82                             |
| 1787140    | RpsA 30S ribosomal subunit protein S1                                                  | 12.76                           | 5.40                                      | 68.83   | 0.72                            | 43.01   | 24                             |
| 1787131    | PflB pyruvate formate lyase I                                                          | 12.57                           | 3.89                                      | 48.85   | 1.79                            | 24.87   | 125                            |
| 1789626    | RplM 50S ribosomal subunit protein L13                                                 | 11.62                           | 14.45                                     | 167.99  | 7.77                            | 40.33   | 19                             |
| 16130606   | RecA DNA strand exchange and recombination protein with protease and nuclease activity | 11.37                           | 2.71                                      | 30.79   | 1.16                            | 7.01    | 299                            |
| 87082390   | FkIB FKBP type peptidyl prolyl cis trans isomerase rotamase                            | 11.23                           | 1.52                                      | 17.04   | 0.22                            | 10.17   | NA <sup>d</sup>                |
| 1786307    | Lpd lipoamide dehydrogenase E3 component is part of three enzyme complexes             | 11.14                           | 12.12                                     | 134.98  | 1.88                            | 61.43   | 95                             |
| 48994988   | TypA GTP binding protein                                                               | 11.11                           | 5.15                                      | 57.21   | 1.52                            | 28.88   | NA <sup>d</sup>                |
| 1788961    | RpsP 30S ribosomal subunit protein S16                                                 | 10.80                           | 20.79                                     | 224.47  | 19.55                           | 97.85   | 9                              |
| 48994898   | IscS cysteine desulfurase tRNA sulfurtransferase PLP dependent                         | 10.79                           | 3.30                                      | 35.61   | 1.29                            | 9.62    | NA <sup>d</sup>                |
| 2367097    | AcnB bifunctional aconitate hydratase 2 2 methylisocitrate dehydratase                 | 10.76                           | 3.58                                      | 38.55   | 1.04                            | 9.62    | 74                             |
| 1789566    | GlmM phosphoglucosamine mutase                                                         | 10.68                           | 3.04                                      | 32.48   | 1.40                            | 16.49   | 304                            |
| 1789142    | PyrG CTP synthetase                                                                    | 10.56                           | 2.66                                      | 28.09   | 0.69                            | 12.92   | NA <sup>d</sup>                |
| 1789690    | RpoA RNA polymerase alpha subunit                                                      | 10.54                           | 5.18                                      | 54.56   | 2.05                            | 38.11   | 32                             |
| 1788633    | AckA acetate kinase A and propionate kinase 2                                          | 9.98                            | 9.44                                      | 94.21   | 4.21                            | 61.50   | 229                            |
| 1789311    | MetK S-adenosylmethionine synthetase                                                   | 9.52                            | 4.13                                      | 39.29   | 1.36                            | 17.26   | 63                             |
| 1789689    | RplQ 50S ribosomal subunit protein L17                                                 | 9.50                            | 17.20                                     | 163.39  | 4.03                            | 123.74  | 59                             |
| 1786305    | AceF pyruvate dehydrogenase dihydrolipoyltransacetylase component E2                   | 9.30                            | 7.64                                      | 71.05   | 2.64                            | 12.56   | 133                            |
| 1790646    | RpsR 30S ribosomal subunit protein S18                                                 | 9.24                            | 2.75                                      | 25.37   | 0.32                            | 15.50   | 78                             |
| 1790170    | AtpD F1 sector of membrane bound ATP synthase beta subunit                             | 9.12                            | 4.53                                      | 41.26   | 1.00                            | 27.19   | 135                            |
| 1786196    | DnaK chaperone Hsp70 co chaperone with DnaJ                                            | 8.94                            | 7.65                                      | 68.41   | 4.48                            | 39.89   | 51                             |
| 1789560    | NusA transcription termination antitermination L factor                                | 8.79                            | 1.10                                      | 9.70    | 0.17                            | 6.91    | 252                            |
| 1790038    | SecB protein export chaperone                                                          | 8.54                            | 6.21                                      | 53.04   | 1.75                            | 37.16   | 54                             |
| 1790494    | Ssb single stranded DNA binding protein                                                | 8.07                            | 2.48                                      | 20.00   | 1.40                            | 22.42   | NA <sup>d</sup>                |
| 87082323   | TnaA tryptophanase L cysteine desulfhydrase PLP dependent                              | 7.51                            | 16.41                                     | 123.28  | 7.89                            | 42.37   | NA <sup>d</sup>                |
| 1789737    | TufA protein chain elongation factor EF Tu duplicate of tufB                           | 7.48                            | 283.18                                    | 2116.84 | 165.04                          | 3176.35 | NA <sup>d</sup>                |
| 1789654    | AccC acetyl CoA carboxylase biotin carboxylase subunit                                 | 7.44                            | 6.01                                      | 44.75   | 0.29                            | 21.22   | 236                            |
| 2367226    | GlpD sn glycerol 3 phosphate dehydrogenase aerobic FAD NADP binding                    | 7.22                            | 7.88                                      | 56.84   | 2.83                            | 40.11   | NA <sup>d</sup>                |
| 1788825    | Bcp peroxiredoxin thiol peroxidase thioredoxin dependent                               | 6.32                            | 3.39                                      | 21.41   | 0.93                            | 18.98   | 88                             |

| GenBank ID | Protein function                                                           | Ratio +DTT/Control <sup>a</sup> | Mean protein quantity (fmol) <sup>b</sup> |         | Standard deviation <sup>b</sup> |         | Abundance ranking <sup>c</sup> |
|------------|----------------------------------------------------------------------------|---------------------------------|-------------------------------------------|---------|---------------------------------|---------|--------------------------------|
|            |                                                                            |                                 | Control                                   | +DTT    | Control                         | +DTT    |                                |
| 1787333    | FabH 3 oxoacyl acyl carrier protein synthase III                           | 5.97                            | 3.24                                      | 19.36   | 0.73                            | 11.32   | 198                            |
| 90111711   | RidA conserved protein UPF0131 family                                      | 5.34                            | 1293.32                                   | 6900.36 | 578.58                          | 1622.31 | NA <sup>d</sup>                |
| 87082331   | TrxA thioredoxin 1                                                         | 4.26                            | 2.32                                      | 9.89    | 2.83                            | 6.99    | NA <sup>d</sup>                |
| 1786304    | AceE pyruvate dehydrogenase decarboxylase component E1 thiamin binding     | 3.61                            | 24.87                                     | 89.82   | 12.50                           | 60.13   | 110                            |
| 1789713    | RplB 50S ribosomal subunit protein L2                                      | 3.59                            | 6.00                                      | 21.56   | 2.90                            | 11.01   | 43                             |
| 1790361    | GlpK glycerol kinase                                                       | 2.84                            | 5.33                                      | 15.13   | 1.45                            | 6.13    | NA <sup>d</sup>                |
| 1790167    | GlmS L glutamine D fructose 6 phosphate aminotransferase                   | 2.44                            | 12.41                                     | 30.31   | 4.47                            | 3.08    | 256                            |
| 1789556    | RpsO 30S ribosomal subunit protein S15                                     | 2.32                            | 108.22                                    | 251.32  | 74.43                           | 124.57  | 60                             |
| 1786899    | Fur DNA binding transcriptional dual regulator of siderophore biosynthesis | 1.49                            | 43.77                                     | 65.10   | 2.82                            | 6.95    | 238                            |
| 606282     | SlyD FKBP type peptidyl prolyl cis trans isomerase rotamase                | 0.84                            | 22.04                                     | 18.62   | 2.64                            | 7.83    | 103                            |

<sup>a</sup> Ratios were calculated from mean protein quantities

<sup>b</sup> Mean protein quantities and standard deviations were calculated from at least two independent biological replicates

<sup>c</sup> Abundance ranking was calculated from<sup>3</sup>

<sup>d</sup> Abundance was not determined in<sup>3</sup>

**Supplementary Table 3: RidA substrate proteins exclusively identified from HOCl-treated cell lysates**

| <b>GenBank ID</b> | <b>Protein function</b>                                                          | <b>Mean protein quantity (fmol) in +DTT samples<sup>a</sup></b> | <b>Standard deviation<sup>a</sup></b> | <b>Abundance ranking<sup>b</sup></b> |
|-------------------|----------------------------------------------------------------------------------|-----------------------------------------------------------------|---------------------------------------|--------------------------------------|
| 226510960         | RhmD L rhamnonate dehydratase                                                    | 156.99                                                          | 53.86                                 | NA <sup>c</sup>                      |
| 2367109           | RpmE 50S ribosomal subunit protein L31                                           | 83.50                                                           | 13.72                                 | 220                                  |
| 87081737          | YajQ phage Phi6 host factor ATP GTP binding protein                              | 77.87                                                           | 59.03                                 | NA <sup>c</sup>                      |
| 1788655           | AccD acetyl CoA carboxylase beta carboxyltransferase subunit                     | 64.41                                                           | 9.98                                  | 275                                  |
| 1787952           | RibE riboflavin synthase beta chain                                              | 40.02                                                           | 34.53                                 | NA <sup>c</sup>                      |
| 1789745           | FkpA FKBP type peptidyl prolyl cis trans isomerase rotamase                      | 39.46                                                           | 7.54                                  | 174                                  |
| 1790366           | HslU molecular chaperone and ATPase component of HslUV protease                  | 37.89                                                           | 26.44                                 | 295                                  |
| 1788546           | RcsB DNA binding response regulator in two component regulatory system with RcsC | 25.95                                                           | 20.46                                 | 230                                  |
| 1786238           | SurA peptidyl prolyl cis trans isomerase PPIase                                  | 25.78                                                           | 5.12                                  | 333                                  |
| 1788877           | IscA FeS cluster assembly protein                                                | 21.89                                                           | 8.91                                  | NA <sup>c</sup>                      |
| 1790211           | PpiC peptidyl prolyl cis trans isomerase C rotamase C                            | 18.61                                                           | 4.23                                  | NA <sup>c</sup>                      |
| 1786356           | DegP serine endoprotease protease Do membrane associated                         | 18.24                                                           | 13.79                                 | 233                                  |
| 1788409           | GatB galactitol specific enzyme IIB component of PTS                             | 18.02                                                           | 7.99                                  | 76                                   |
| 1786382           | AccA acetyl CoA carboxylase carboxytransferase alpha subunit                     | 17.83                                                           | 9.36                                  | 221                                  |
| 2367277           | YifE conserved protein UPF0438 family                                            | 13.06                                                           | 13.47                                 | 196                                  |
| 87082236          | MreB cell wall structural complex MreBCD actin like component MreB               | 8.01                                                            | 2.14                                  | NA <sup>c</sup>                      |
| 1790842           | DeoA thymidine phosphorylase                                                     | 7.23                                                            | 5.03                                  | NA <sup>c</sup>                      |
| 1789102           | TruD tRNA Glu pseudouridine 13 synthase                                          | 5.14                                                            | 3.47                                  | NA <sup>c</sup>                      |

<sup>a</sup> Mean protein quantities and standard deviations were calculated from at least two independent biological replicates

<sup>b</sup> Abundance ranking was calculated from<sup>34</sup>

<sup>c</sup> Abundance was not determined in<sup>3</sup>

**Supplementary Table 4: Biochemical characteristics of proteins tested for HOCl-mediated chaperone activity**

| <b>Protein</b>         | <b>MW</b> | <b>localization<sup>a</sup></b> | <b>chaperone activity</b> | <b>Cys count</b> | <b>% Cys</b> | <b>disulfide bonds<sup>a</sup></b> | <b>Met count</b> | <b>% Met</b> | <b>Lys count</b> | <b>% Lys</b> | <b>Arg count</b> | <b>% Arg</b> | <b>GRAVY<sup>b</sup></b> | <b>pI</b> |
|------------------------|-----------|---------------------------------|---------------------------|------------------|--------------|------------------------------------|------------------|--------------|------------------|--------------|------------------|--------------|--------------------------|-----------|
| RidA                   | 13.6      | cytoplasmic                     | yes (high)                | 1                | 0.8          | 0                                  | 1                | 1.8          | 8                | 6.2          | 5                | 3.9          | 0.086                    | 5.36      |
| BSA                    | 66.3      | extracellular                   | yes (high)                | 35               | 6.0          | 17                                 | 4                | 0.7          | 59               | 10.1         | 23               | 4.0          | -0.469                   | 5.65      |
| $\beta$ -lactoglobulin | 18.3      | extracellular                   | yes (med)                 | 5                | 3.1          | 2                                  | 4                | 2.5          | 15               | 9.3          | 3                | 1.9          | -0.162                   | 4.83      |
| DUK114                 | 14.9      | cytoplasmic                     | yes (med)                 | 3                | 2.2          | NA                                 | 3                | 2.2          | 13               | 9.4          | 4                | 2.9          | 0.041                    | 7.64      |
| $\alpha$ -amylase      | 55.4      | extracellular                   | yes (med)                 | 12               | 2.4          | 5                                  | 9                | 1.8          | 19               | 3.8          | 28               | 5.6          | -0.369                   | 6.35      |
| RNaseA                 | 13.7      | extracellular                   | no                        | 8                | 6.5          | 4                                  | 4                | 3.2          | 10               | 8.1          | 4                | 3.2          | -0.663                   | 8.64      |
| Lipase                 | 50.0      | extracellular                   | no                        | 14               | 3.1          | 6/7                                | 4                | 0.9          | 42               | 4.9          | 30               | 4.7          | -0.356                   | 5.73      |
| Lysozyme               | 14.3      | extracellular                   | aggregates                | 8                | 6.2          | 4                                  | 2                | 1.6          | 6                | 4.7          | 11               | 8.5          | -0.472                   | 9.32      |

<sup>a</sup>according to UniProt<sup>4</sup>

<sup>b</sup>grand average of hydropathicity (GRAVY) according to Protein Identification and Analysis Tools on the ExPASy Server<sup>5</sup>



## SUPPLEMENTARY REFERENCES

1. Datsenko, K. A. & Wanner, B. L. One-step inactivation of chromosomal genes in *Escherichia coli* K-12 using PCR products. *Proc. Natl. Acad. Sci. U.S.A.* **97**, 6640–6645 (2000).
2. Lindemann, C. *et al.* Redox proteomics uncovers peroxynitrite-sensitive proteins that help *Escherichia coli* to overcome nitrosative stress. *J Biol Chem* **288**, 19698–19714 (2013).
3. Lu, P., Vogel, C., Wang, R., Yao, X. & Marcotte, E. M. Absolute protein expression profiling estimates the relative contributions of transcriptional and translational regulation. *Nat. Biotechnol.* **25**, 117–124 (2007).
4. The UniProt Consortium. Activities at the Universal Protein Resource (UniProt). *Nucleic Acids Res.* **42**, 7486–7486 (2014).
5. Gasteiger E., Hoogland C., Gattiker A., Duvaud S., Wilkins M.R., Appel R.D., Bairoch A.; Protein Identification and Analysis Tools on the ExPASy Server; (In) John M. Walker (ed): The Proteomics Protocols Handbook, Humana Press (2005). pp. 571-607
